# Supplementary material for: Microbial Population Dynamics and the Role of Sulfur Reducing Bacteria Genes in Stabilizing Pb, Zn and Cd in the Terrestrial Subsurface
Source: Preprints.org preprint supplement (doi:10.20944/preprints201808.0082.v1), 2018-08-04
Supplement: Supplementary file 1 [file supplementary]

## Supplementary Information for

### Microbial population dynamics and the role of SRB genes in stabilizing Pb and Zn in the terrestrial subsurface

Ranju R. Karna,<sup>†</sup> Ganga M. Hettiarachchi<sup>†#</sup>, Joy D. Van Nostrand,<sup>‡</sup> Tong Yuan,<sup>‡</sup>  
Charles W. Rice,<sup>§</sup> Y. M. Assefa,<sup>†</sup> Jizhong Zhou<sup>‡</sup>

<sup>†</sup>Soil and Environmental Chemistry, Department of Agronomy, Kansas State University, Manhattan, Kansas 66506, United States.

<sup>§</sup> Soil and Environmental Microbiology, Department of Agronomy, Kansas State University, Manhattan, Kansas 66506, United States.

<sup>‡</sup> Institute of Environmental Genomics and Department of Microbiology and Plant Biology, University of Oklahoma, Norman, OK-73019, United States.

Earth Sciences Division, Lawrence Berkeley National Laboratory, Berkeley, CA 94720, United States.

School of Environment, Tsinghua University, Beijing 100084, China.

#Corresponding Author (ganga@ksu.edu)

Contribution no. 15-212-J from the Kansas Agric. Exp. Stn

The supplementary information includes 6 figures and 3 tables.

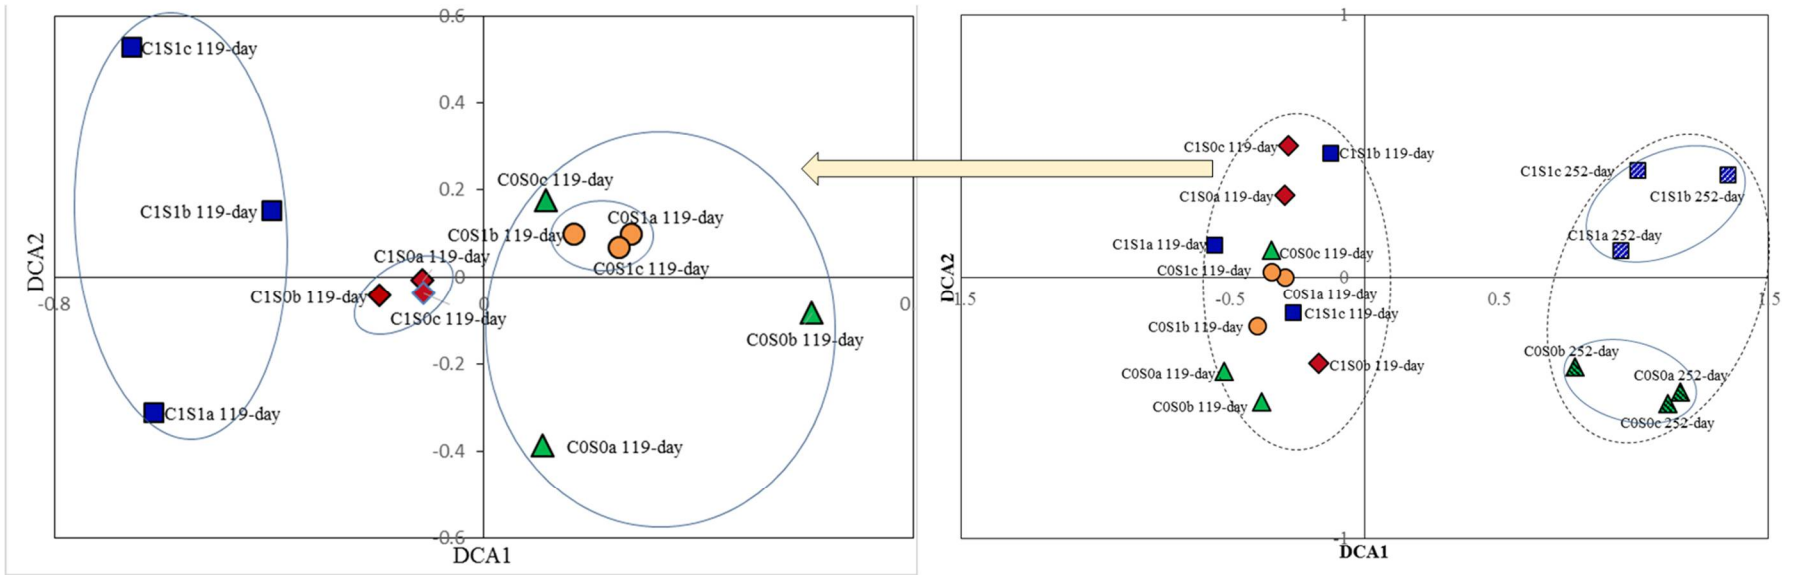

Figure S1: Detrended correspondence analysis (DCA) for the total number of detected genes under medium- (119-day) and long-term (252-day) submergence indicating community structure changes. All the treatments; C0S0, C0S1, C1S0, and C1S1 (solid filled markers) from medium-term submergence, and only C0S0, and C1S1 (pattern filled markers) from long-term submergence are plotted.

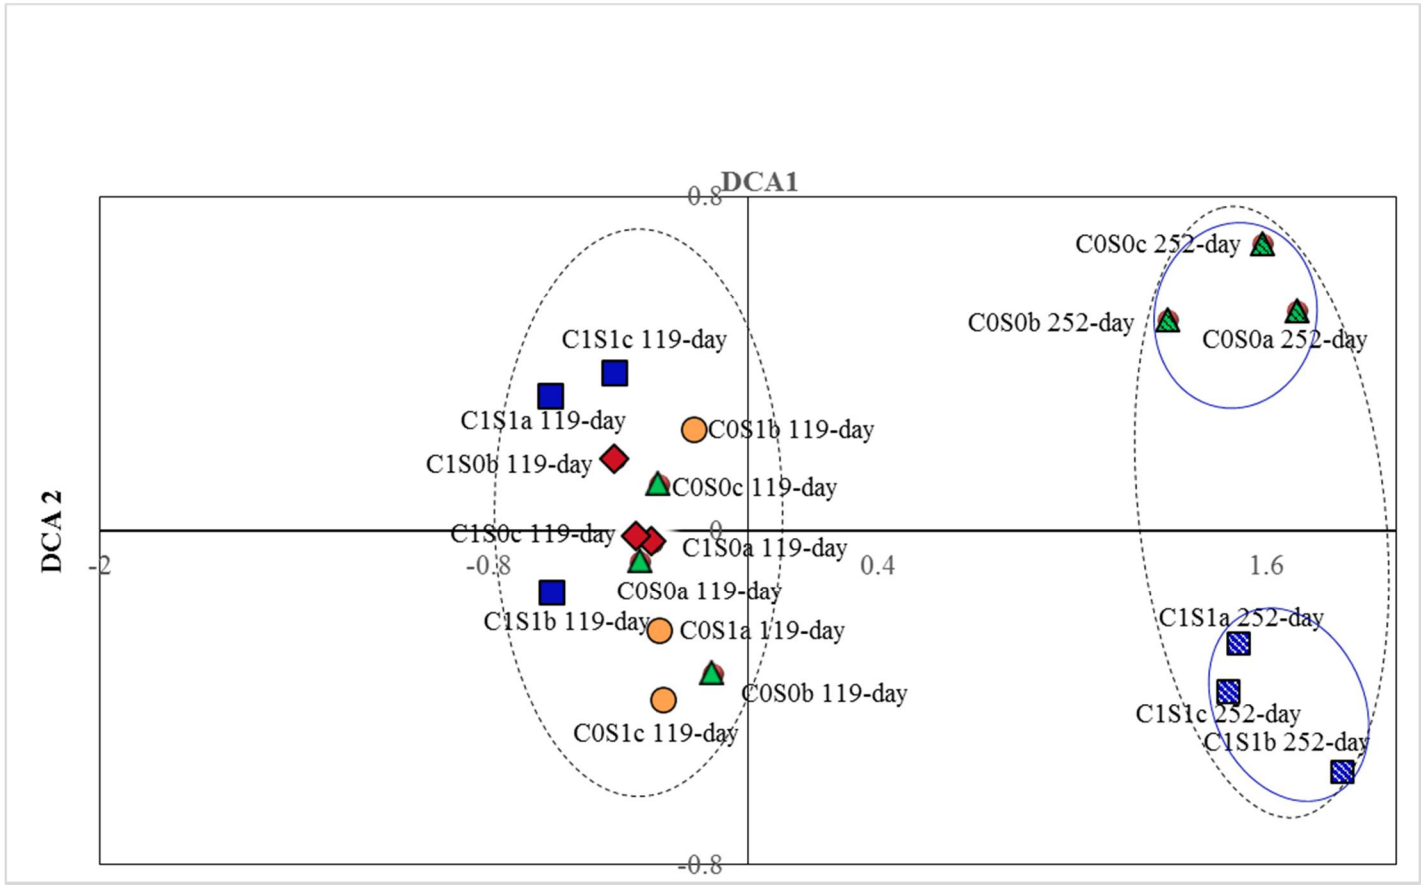

Figure S2: Detrended correspondence analysis (DCA) of functional genes in the metal resistance category showing change in community structure under medium- (119-day) and long-term (252-day) submergence. All the treatments; C0S0, C0S1, C1S0, and C1S1 (solid filled markers) from medium-term submergence, and only C0S0, and C1S1 (pattern filled markers) from long-term submergence are plotted.

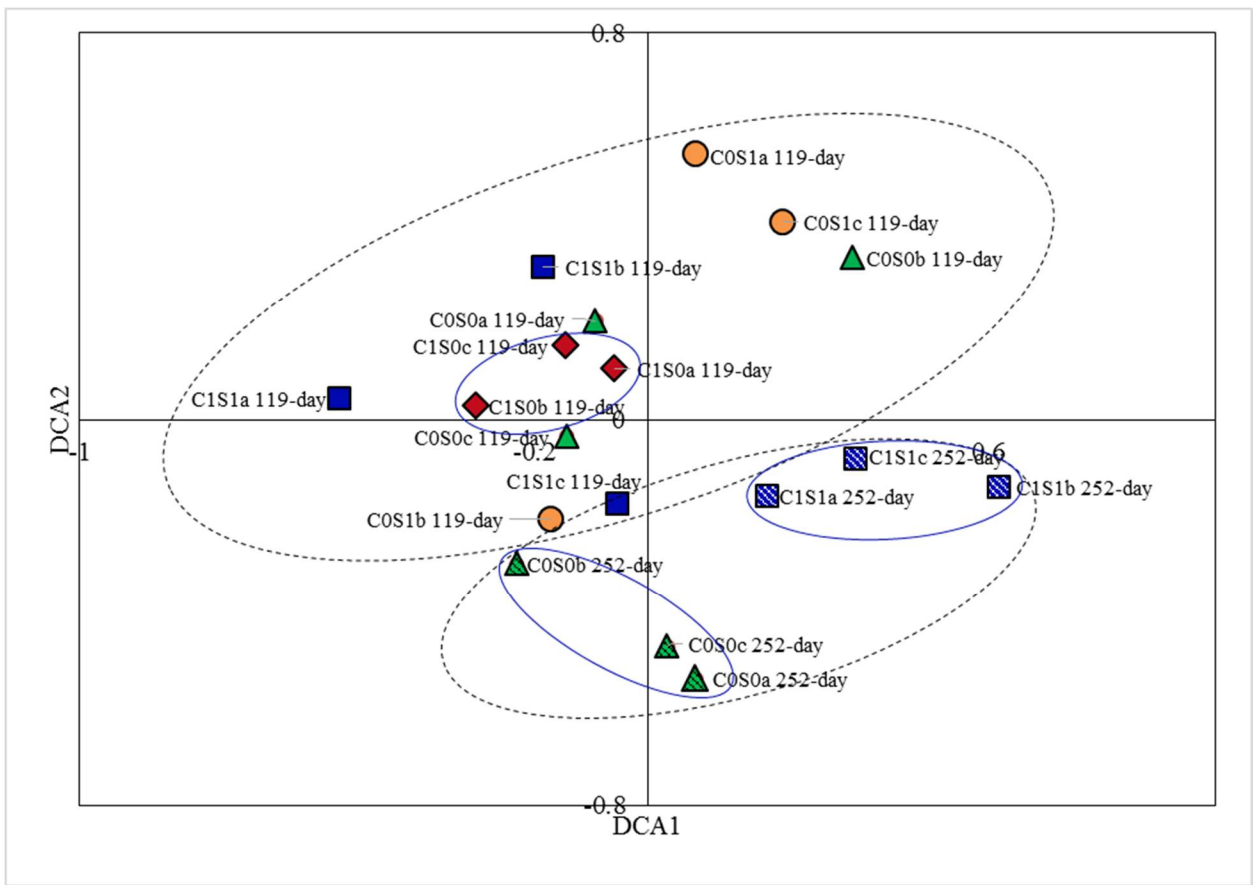

Figure S3: Detrended correspondence analysis (DCA) of functional genes in the C-cycling category showing change in community structure under medium- (119-day) and long-term (252-day) submergence. All the treatments; COS0, COS1, C1S0, and C1S1 (solid filled markers) from medium-term submergence, and only COS0, and C1S1 (pattern filled markers) from long-term submergence are plotted.

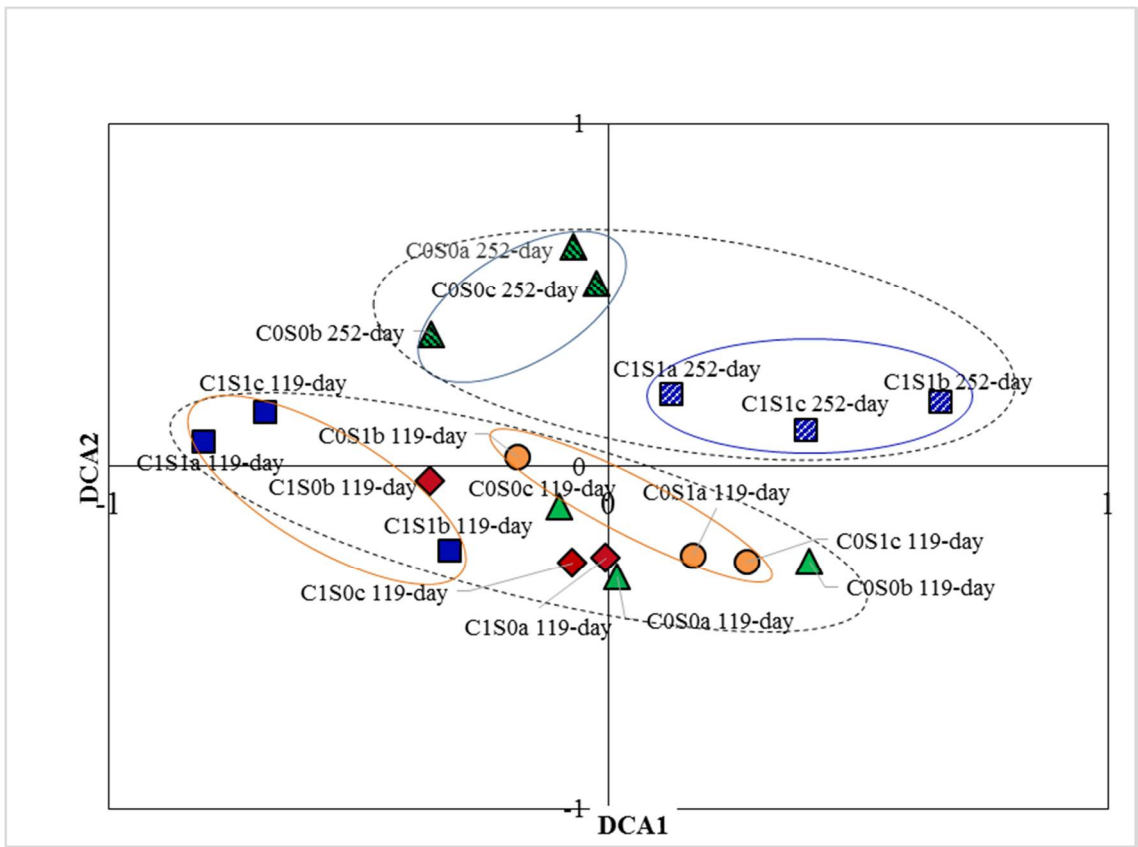

Figure S4: Detrended correspondence analysis (DCA) of functional genes in the sulfur category showing change in community structure under medium- (119-day), and long-term (252-day) submergence. All the treatments; C0S0, C0S1, C1S0, and C1S1 (solid filled markers) from medium-term submergence, and only C0S0, and C1S1 (pattern filled markers) from long-term submergence are plotted.

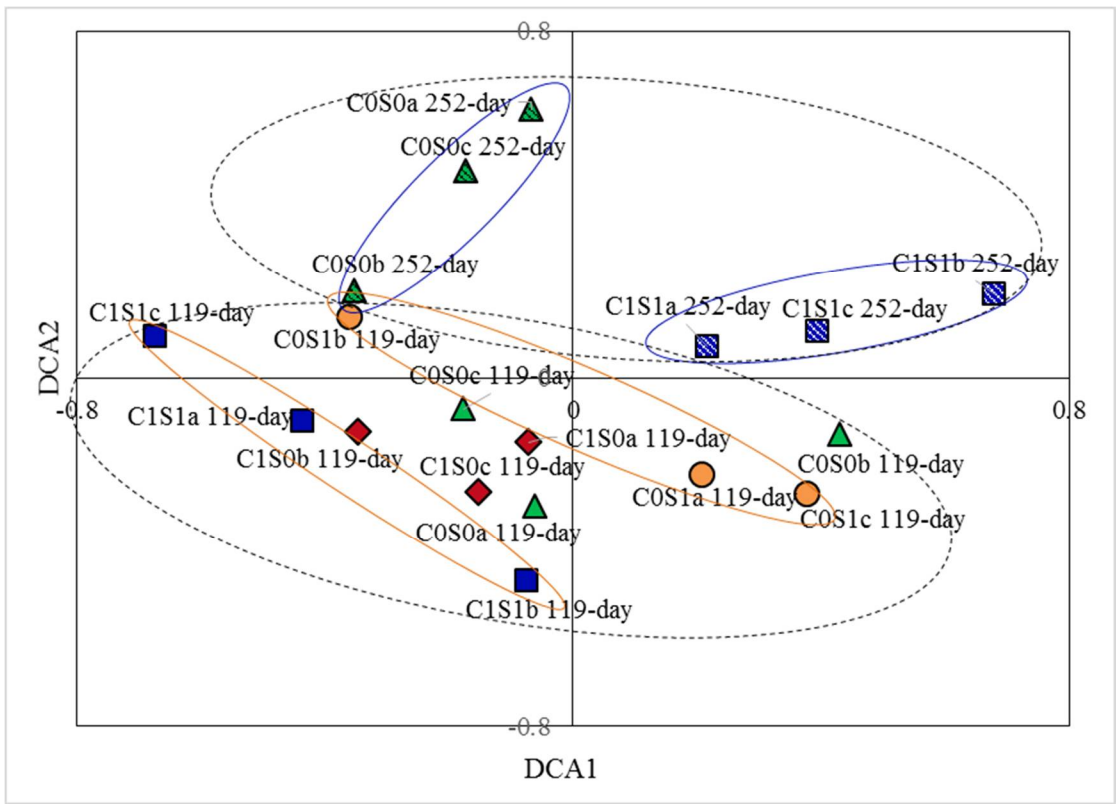

Figure S5: Detrended correspondence analysis (DCA) of *dsrB* showing a change in community structure under medium- (119-day), and long-term (252-day) submergence. All the treatments; C0S0, C0S1, C1S0, and C1S1 (solid filled markers) from medium-term submergence, and only C0S0, and C1S1 (pattern filled markers) from long-term submergence are plotted.

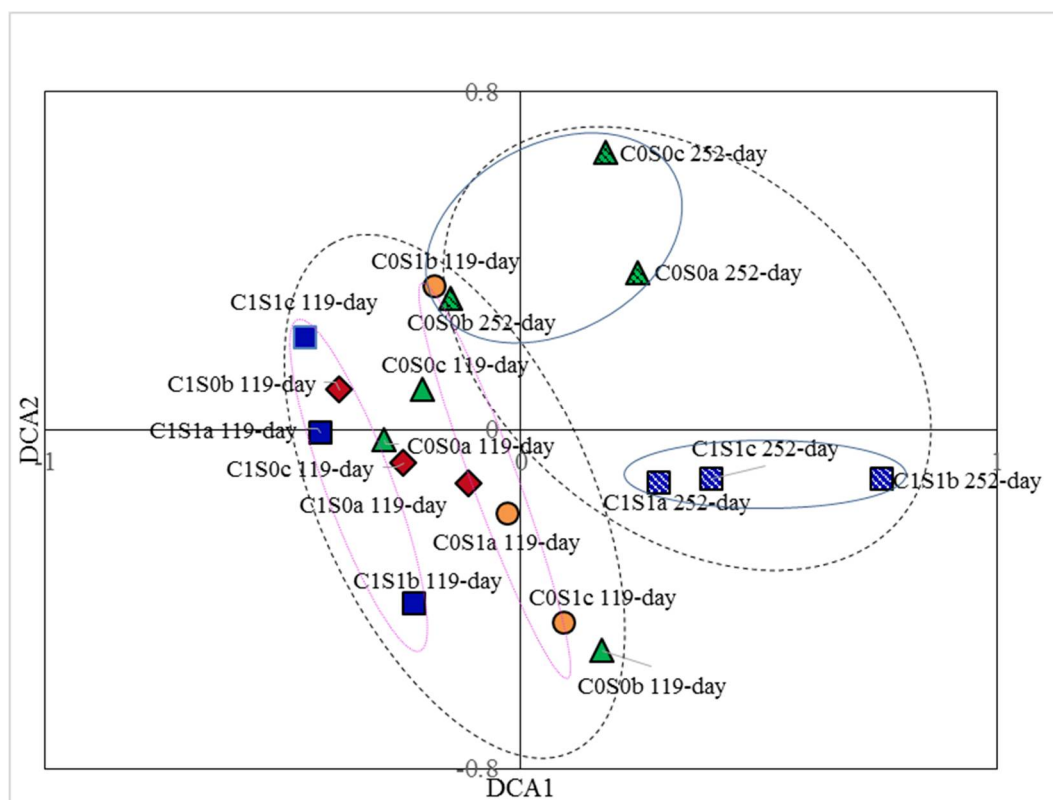

Figure S6: Detrended correspondence analysis (statistics) of **dsrA** showing a change in community structure under medium- (119-day), and long-term (252-day) submergence. All the treatments; C0S0, C0S1, C1S0, and C1S1 (solid filled markers) from medium-term submergence, and only C0S0, and C1S1 (pattern filled markers) from long-term submergence are plotted.

Table S1: Summary of total phospholipid fatty acid analysis (PLFA) biomarkers detected in original mine tailings, submerged control, and submerged treated materials under 119-day (medium-term) submergence

|                  | Common<br>microbial<br>group | Gram<br>positive<br>Bacteria | Gram<br>negative<br>Bacteria | Desulfovibrio | Fungi      | Fungi<br>Arbuscular<br>Mycorrhiza | Actinomycetes | Total<br>PLFA<br>(nmole/g) |
|------------------|------------------------------|------------------------------|------------------------------|---------------|------------|-----------------------------------|---------------|----------------------------|
| Mine<br>tailings | 0.76                         | 0.42                         | 0.29                         | 0.02          | 0.73       | 0.13                              | 0.08          | 2.42                       |
| Sludge           | 1.91                         | 1.15                         | 1.84                         | 0.09          | 0.86       | 0.31                              | 0.02          | 6.18                       |
| C0S0             | 0.82±0.004                   | 0.67±0.001                   | 0.35±0.005                   | 0.02±0.002    | 0.35±0.008 | 0.06±0.001                        | 0.04±0.002    | 2.31                       |
| C1S1             | 4.03±0.12                    | 3.10±0.14                    | 1.39±0.20                    | 3.22±0.10     | 0.62±0.006 | 0.05±0.002                        | 0.05±0.005    | 12.47                      |



Table S2: Total element concentration in the mine waste fraction of <2mm collected from the Tri-State mining district.

| Element             | Cd | Pb   | Zn    | Fe   | Mn | S    |
|---------------------|----|------|-------|------|----|------|
| mg kg <sup>-1</sup> | 67 | 5048 | 23468 | 6834 | 97 | 9458 |

Table S3: Bray Curtis dissimilarity test giving  $\rho$ -value for each treatment during medium- (119-day) and long-term (252-day) submergence.

| Group                        | Adonis Bray |
|------------------------------|-------------|
| Whole                        | 0.001       |
| C0S0 119-day vs C0S0 252-day | 0.001       |
| C0S0 119-day vs C1S1 119-day | 0.001       |
| C0S0 119-day vs C1S1 252-day | 0.001       |
| C0S0 119-day vs C0S1 119-day | 0.001       |
| C0S0 119-day vs C1S0 119-day | 0.132       |
| C0S0 252-day vs C1S1 119-day | 0.11        |
| C0S0 252-day vs C1S1 252-day | 0.039       |
| C0S0 252-day vs C0S1 119-day | 0.09        |
| C0S0 252-day vs C1S0 119-day | 0.013       |
| C1S1 119-day vs C1S1 252-day | 0.068       |
| C1S1 119day vs C0S1 119-day  | 0.001       |
| C1S1 119-day vs C1S0 119-day | 0.001       |
| C1S1 252-day vs C0S1 119-day | 0.497       |
| C1S1 252-day vs C1S0 119-day | 0.001       |
| C0S1 119-day vs C1S0 119-day | 0.305       |

The  $\rho$ -values were calculated based on total number of detected genes.
